# Supplementary material for: The Genetic Basis for the Increased Prevalence of Metabolic Syndrome among Post-Traumatic Stress Disorder Patients
Source: MDPI journal article supplement (doi:10.3390/ijms232012504), 2022-10-19
Supplement: s1 [file s1]

## Supplementary Figures and Tables

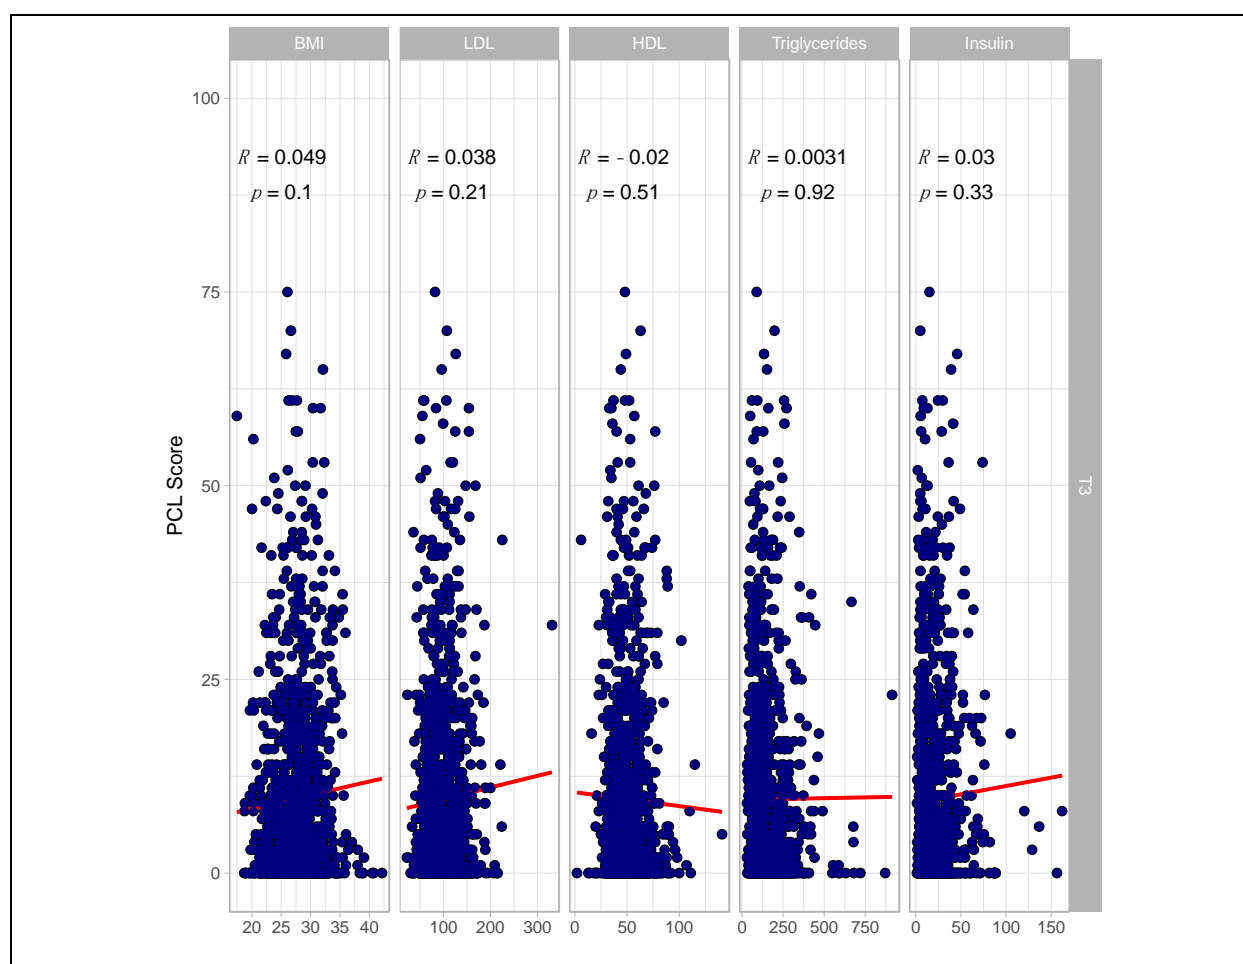

**Figure S1.** Components of the MetS are not significantly correlated with PTSD severity score in a cohort with recent PTSD symptom presentation.

Table S1. Descriptive table for FCC cohort.

|                   | Negative<br>(N=1030) | Positive<br>(N=104) | Overall<br>(N=1134) |
|-------------------|----------------------|---------------------|---------------------|
| <b>PCL_score</b>  |                      |                     |                     |
| Mean (SD)         | 6.38 (7.71)          | 41.7 (10.2)         | 9.61 (12.9)         |
| Median [Min, Max] | 3.00 [0, 30.0]       | 38.5 [31.0, 75.0]   | 4.00 [0, 75.0]      |
| <b>GENDER</b>     |                      |                     |                     |
| Female            | 69 (6.7%)            | 13 (12.5%)          | 82 (7.2%)           |
| Male              | 961 (93.3%)          | 91 (87.5%)          | 1052 (92.8%)        |
| <b>T1_AGE</b>     |                      |                     |                     |
| Mean (SD)         | 25.6 (5.91)          | 26.5 (6.06)         | 25.7 (5.92)         |
| Median [Min, Max] | 24.0 [18.0, 51.0]    | 25.0 [20.0, 44.0]   | 24.0 [18.0, 51.0]   |
| Missing           | 533 (51.7%)          | 62 (59.6%)          | 595 (52.5%)         |
| <b>RACE</b>       |                      |                     |                     |
| Asian             | 29 (2.8%)            | 0 (0%)              | 29 (2.6%)           |
| Black             | 134 (13.0%)          | 12 (11.5%)          | 146 (12.9%)         |
| White             | 676 (65.6%)          | 71 (68.3%)          | 747 (65.9%)         |
| Native American   | 9 (0.9%)             | 1 (1.0%)            | 10 (0.9%)           |
| Hispanic          | 130 (12.6%)          | 16 (15.4%)          | 146 (12.9%)         |
| Other             | 50 (4.9%)            | 4 (3.8%)            | 54 (4.8%)           |
| Missing           | 2 (0.2%)             | 0 (0%)              | 2 (0.2%)            |
| <b>BMI</b>        |                      |                     |                     |
| Mean (SD)         | 27.4 (3.58)          | 27.9 (3.55)         | 27.4 (3.58)         |
| Median [Min, Max] | 27.2 [18.7, 42.1]    | 27.8 [17.5, 35.9]   | 27.3 [17.5, 42.1]   |
| Missing           | 12 (1.2%)            | 1 (1.0%)            | 13 (1.1%)           |
| <b>HDL</b>        |                      |                     |                     |
| Mean (SD)         | 50.6 (14.2)          | 50.0 (15.0)         | 50.5 (14.3)         |
| Median [Min, Max] | 49.0 [2.00, 141]     | 48.0 [6.00, 89.0]   | 49.0 [2.00, 141]    |
| Missing           | 17 (1.7%)            | 3 (2.9%)            | 20 (1.8%)           |
| <b>LDL</b>        |                      |                     |                     |
| Mean (SD)         | 97.9 (31.9)          | 102 (40.7)          | 98.3 (32.8)         |

Table S1. Descriptive table for FCC cohort.

|                      | <b>Negative<br/>(N=1030)</b> | <b>Positive<br/>(N=104)</b> | <b>Overall<br/>(N=1134)</b> |
|----------------------|------------------------------|-----------------------------|-----------------------------|
| Median [Min, Max]    | 94.0 [22.0, 224]             | 96.0 [36.0, 331]            | 94.5 [22.0, 331]            |
| Missing              | 41 (4.0%)                    | 7 (6.7%)                    | 48 (4.2%)                   |
| <b>Triglycerides</b> |                              |                             |                             |
| Mean (SD)            | 146 (99.5)                   | 148 (104)                   | 147 (99.9)                  |
| Median [Min, Max]    | 120 [30.0, 913]              | 116 [40.0, 666]             | 120 [30.0, 913]             |
| Missing              | 17 (1.7%)                    | 3 (2.9%)                    | 20 (1.8%)                   |
| <b>Insulin</b>       |                              |                             |                             |
| Mean (SD)            | 19.0 (17.8)                  | 20.1 (15.4)                 | 19.1 (17.6)                 |
| Median [Min, Max]    | 13.4 [1.30, 162]             | 16.1 [2.20, 73.9]           | 13.5 [1.30, 162]            |
| Missing              | 19 (1.8%)                    | 4 (3.8%)                    | 23 (2.0%)                   |
